# Supplementary material for: ERA5-Land: a state-of-the-art global reanalysis dataset for land applications
Source: Copernicus journal article supplement (doi:10.5194/essd-13-4349-2021), 2021-09-07
Supplement: Supplementary file 1 [file essd-13-4349-2021-supplement.pdf]

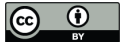

*Supplement of*

## **ERA5-Land: a state-of-the-art global reanalysis dataset for land applications**

**Joaquín Muñoz-Sabater et al.**

*Correspondence to:* Joaquín Muñoz-Sabater ([joaquin.munoz@ecmwf.int](mailto:joaquin.munoz@ecmwf.int))

The copyright of individual parts of the supplement might differ from the article licence.

## Supplementary Figures

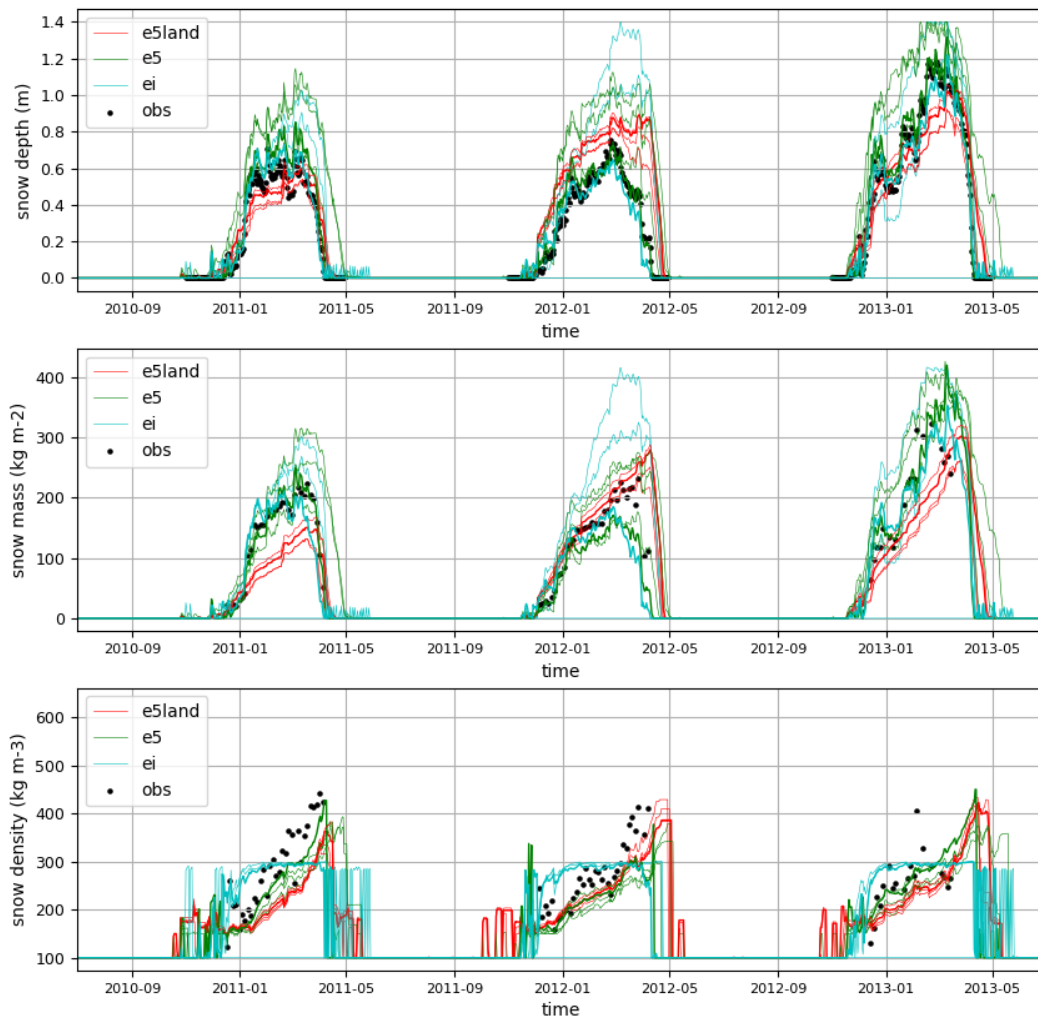

**Figure S1.** Time series of snow depth (top panel), mass (middle panel) and density (bottom panel) for ERA5-Land (e5land, red lines), ERA5 (e5, green lines) and ERA-Interim (ei, cyan lines) at the Sapporo ESM-SnowMIP site (see Table 3), for the period Sept 2010 to May 2013. The thicker line corresponds to the nearest point to the observations location, the thinner lines are the 3 other nearest neighbour locations.

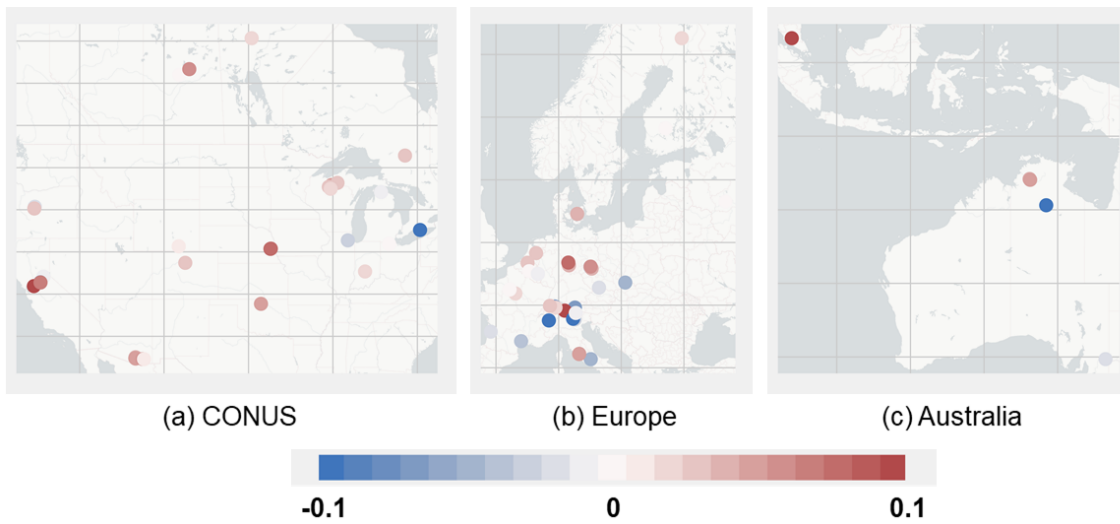

**Figure S2.** Standardised anomaly correlation ( $R_{AN}$ ) difference of the surface sensible heat flux between ERA5-Land and ERA5 with respect to eddy-covariance data. Blue colours indicate that the anomaly correlation of ERA5-Land with respect to eddy-covariance measurements is higher than for ERA5, whereas red colours indicate the opposite.

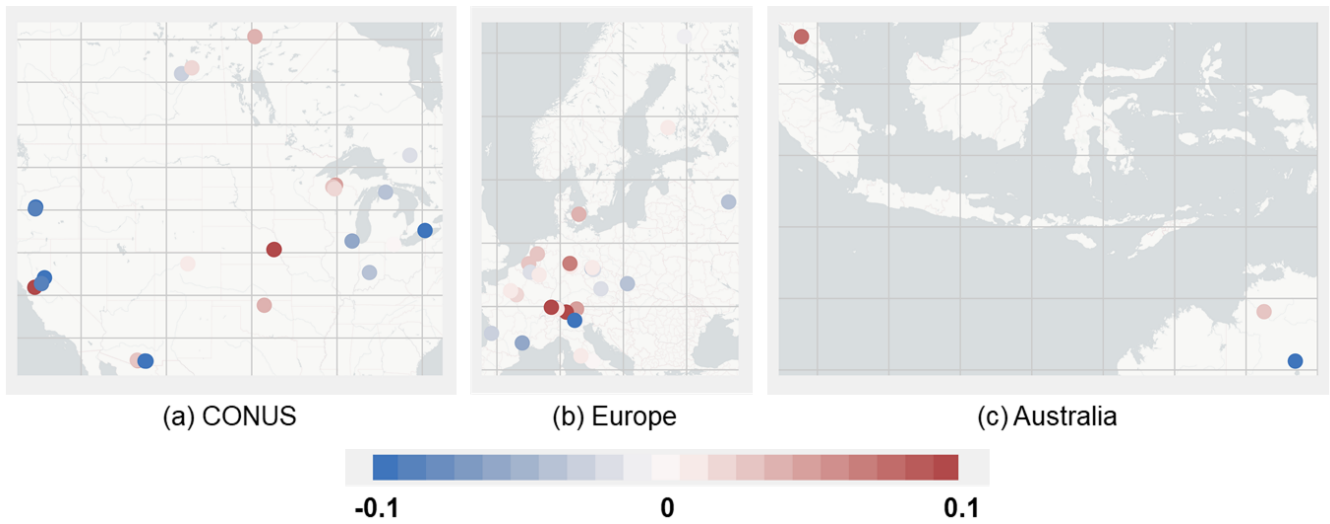

**Figure S3.** Standardised anomaly correlation ( $R_{AN}$ ) difference of the Bowen ration between ERA5-Land and ERA5 with respect to eddy-covariance data. Blue colours indicate that the anomaly correlation of ERA5-Land with respect to eddy-covariance measurements is higher than for ERA5, whereas red colours indicate the opposite.

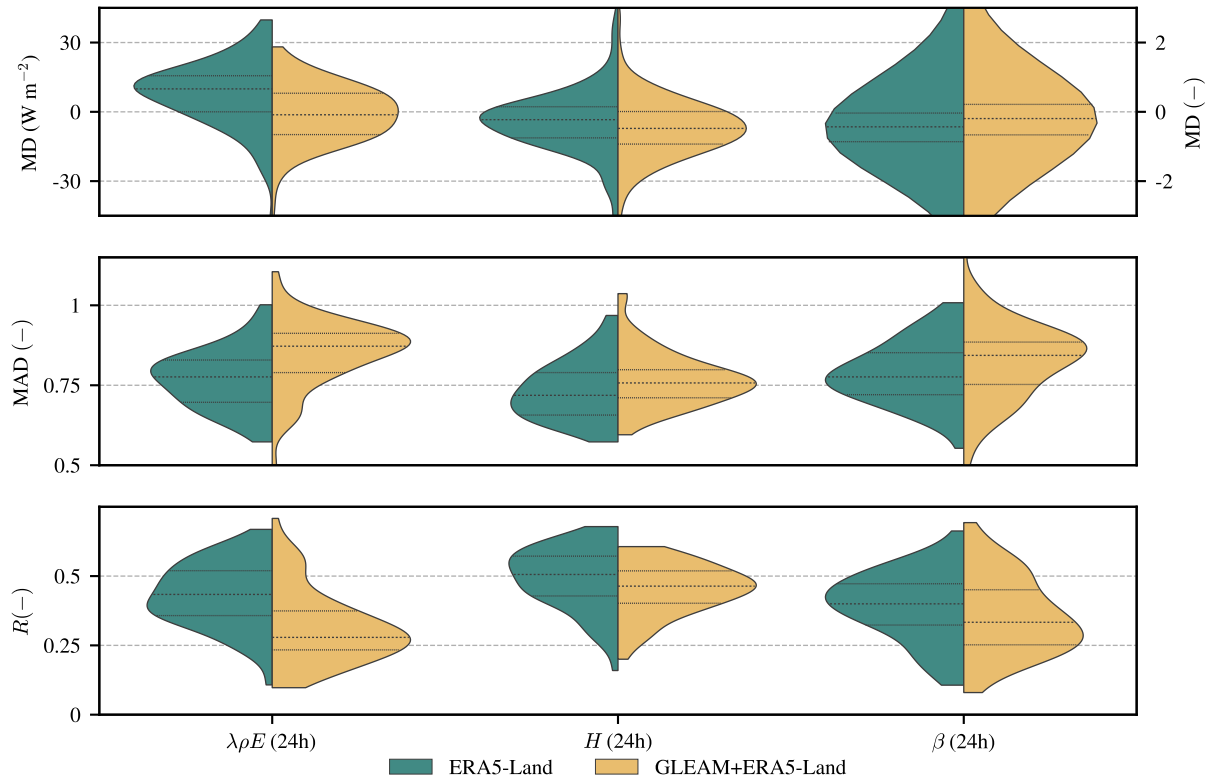

**Figure S4.** Violin plots showing the temporally and spatially averaged statistics of the surface latent heat flux ( $\lambda\rho E$ ), surface sensible heat flux ( $H$ ), and Bowen ratio ( $\beta$ ) from ERA5-Land (green) and GLEAM+ERA5-Land (yellow). Statistics are calculated with respect to in situ eddy-covariance measurements at daily (24 h) temporal resolution. Violin plots represent the distribution of the individual validation statistics with indication of the median and inter-quartile range, and are calculated using a kernel density estimation approach. Statistics include the Bias, Mean Absolute Error (MAE), and the anomaly correlation coefficient ( $R_{AN}$ ). The scale used to show the bias distribution of  $\beta$  is that of the right y-axis on the top row.

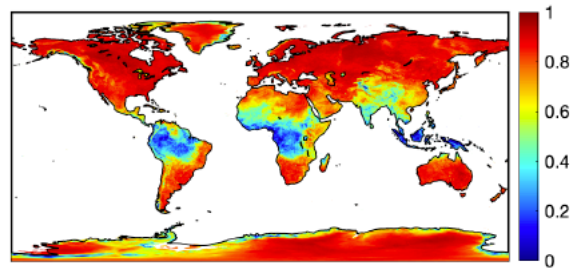

(a)  $R_{AN}$ : ERA5-Land vs MODIS LST

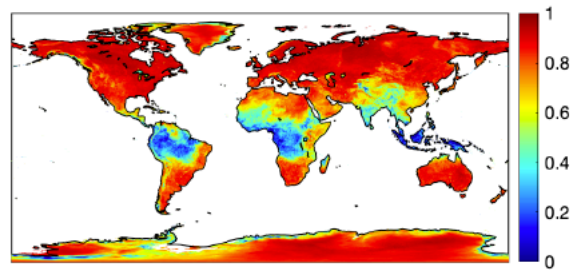

(b)  $R_{AN}$ : ERA5 vs MODIS LST

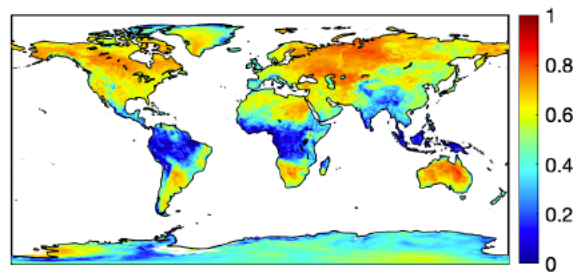

(c)  $R_{AN}$ : ERA-Interim vs MODIS LST

**Figure S5.** Global anomaly correlation coefficient ( $R_{AN}$ ) maps of ERA5-Land (a), ERA5 (b) and ERA-Interim (c) versus MODIS LST average ensemble for the time period 2003–2018.
